# Supplementary figures and images for: Induction of multi-antigen multi-stage immune responses against Plasmodium falciparum in rhesus monkeys, in the absence of antigen interference, with heterologous DNA prime/poxvirus boost immunization
Source: Springer Nature journal article supplement (doi:10.1186/1475-2875-6-135), 2007-10-09

# Geomean OD 0.5 Units

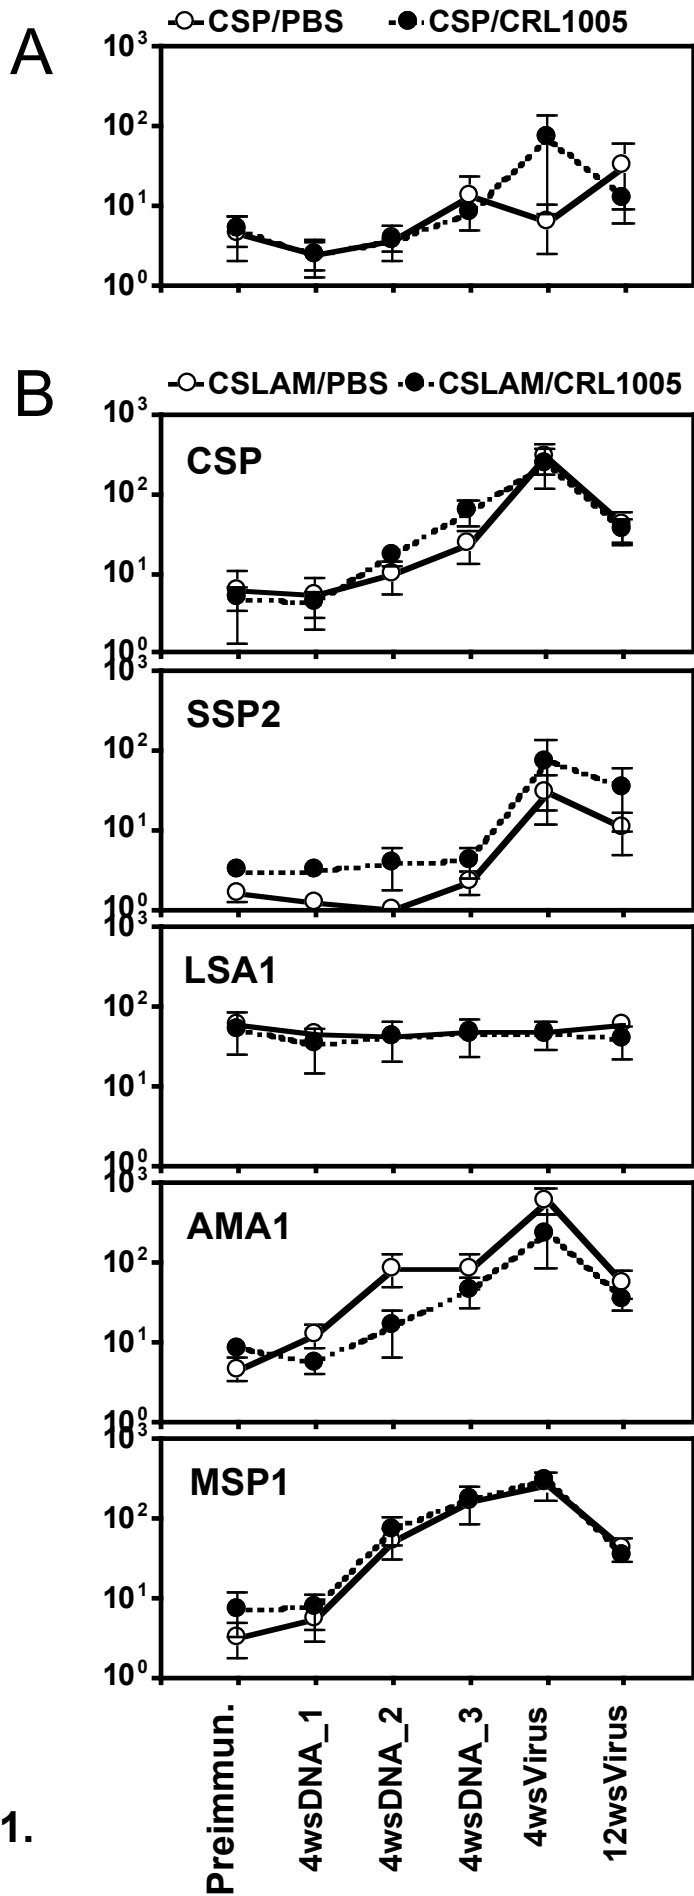

Supplementary Figure 1.

Supplement: Additional file 1 [file 1475-2875-6-135-s1.pdf]
